# Supplementary material for: Classwide Functional Analysis and Comparison of Function-Based Interventions with Preschoolers
Source: Springer Nature journal article supplement (doi:10.1186/s12890-020-01184-w), 2011-01-01
Supplement: MOESM1 [file 18032154]

| Sensor location                         |                                   | Forearm        | Chest          | Earlobe     | Forehead    |
|-----------------------------------------|-----------------------------------|----------------|----------------|-------------|-------------|
| N                                       |                                   | 143            | 129            | 17          | 6           |
| Age (years old)                         |                                   | 73.8±13.9      | 74.3±14.4      | 70.6±18.0   | 63.5±24.9   |
| Gender (M/F)                            |                                   | 84/59          | 84/45          | 12/5        | 4/2         |
| Body mass index (kg/m <sup>2</sup> )    |                                   | 22.2±4.0       | 22.0±4.6       | 23.0±3.1    | 20.7±2.6    |
| Breakdown of subjects (biggest problem) | Healthy volunteer                 | 4              | 4              | 1           | 1           |
|                                         | Pneumonia                         | 42             | 33             | 3           | 4           |
|                                         | COPD (ACO, Emphysema, Bronchitis) | 30 (17, 12, 1) | 36 (22, 13, 1) | 5 (2, 2, 1) | 1 (1, 0, 0) |
|                                         | Interstitial lung disease         | 25             | 16             | 0           | 0           |
|                                         | Asthma                            | 16             | 10             | 3           | 0           |
|                                         | Acute bronchitis                  | 5              | 8              | 3           | 0           |
|                                         | Lung cancer                       | 6              | 4              | 0           | 0           |
|                                         | Sleep apnea syndrome              | 5              | 2              | 1           | 0           |
|                                         | Bronchiectasis                    | 3              | 4              | 1           | 0           |
|                                         | Tumor-like shadow                 | 3              | 4              | 1           | 0           |
|                                         | Non-COPD emphysema                | 2              | 1              | 0           | 0           |
|                                         | Obesity hypoventilation syndrome  | 0              | 2              | 0           | 0           |
| Others                                  | 4 (#1)                            | 5 (#2)         | 0              | 0           |             |

#1: Pneumothorax, eosinophilic granulomatosis, empyema and pleuritis.

#2: Dyspnea (neurosis), bronchial foreign body, empyema, conscious loss and chronic pulmonary thromboembolism.

ACO: Asthma-chronic obstructive pulmonary disease (COPD) overlap.

COPD: Chronic obstructive pulmonary disease.

There was no significant difference in age or body mass index among the four groups (ANOVA with Tukey's post-hoc test).

| Sensor location                      | Forearm   | Chest     | Earlobe            | Forehead           | Forearm or Chest | All       |
|--------------------------------------|-----------|-----------|--------------------|--------------------|------------------|-----------|
| N                                    | 143       | 129       | 17                 | 6                  | 272              | 295       |
| PtcCO <sub>2</sub> at 30 min. (mmHg) | 45.2±5.4  | 45.6±8.5  | 46.1±4.3           | 49.7±6.1           | 45.4±7.0         | 45.6±6.9  |
| PaCO <sub>2</sub> (mmHg)             | 40.8±5.3  | 40.6±8.9  | 38.2±5.0           | 40.5±6.2           | 40.7±7.2         | 40.5±7.1  |
| PtcO <sub>2</sub> at 30 min. (mmHg)  | 67.8±13.0 | 65.6±13.4 | 39.9±16.9<br>**, ‡ | 26.5±13.9<br>**, ‡ | 66.8±13.3        | 64.4±15.8 |
| PaO <sub>2</sub> (mmHg)              | 79.6±12.0 | 78.2±12.2 | 75.4±15.7          | 76.0±9.1           | 79.0±12.1        | 78.7±12.2 |
| pH                                   | 7.43±0.03 | 7.43±0.05 | 7.44±0.04          | 7.43±0.04          | 7.43±0.04        | 7.43±0.04 |
| SpO <sub>2</sub> (%)                 | 96.0±2.0  | 95.7±2.5  | 94.8±6.6           | 96.3±1.2           | 95.8±2.2         | 95.8±2.6  |
| Pulse (/min)                         | 74.3±13.7 | 74.7±14.1 | 75.4±12.3          | 74.7±12.0          | 74.5±13.9        | 74.6±13.7 |

ANOVA with Tukey's post-hoc test was performed among the four sensor locations.  
 \*\*: p < 0.01 compared with forearm. ‡: p < 0.01 compared with chest.
