# Supplementary material for: Classwide Functional Analysis and Comparison of Function-Based Interventions with Preschoolers
Source: Springer Nature journal article supplement (doi:10.1186/s12890-020-01184-w), 2011-01-01
Supplement: MOESM2 [file 18032154]

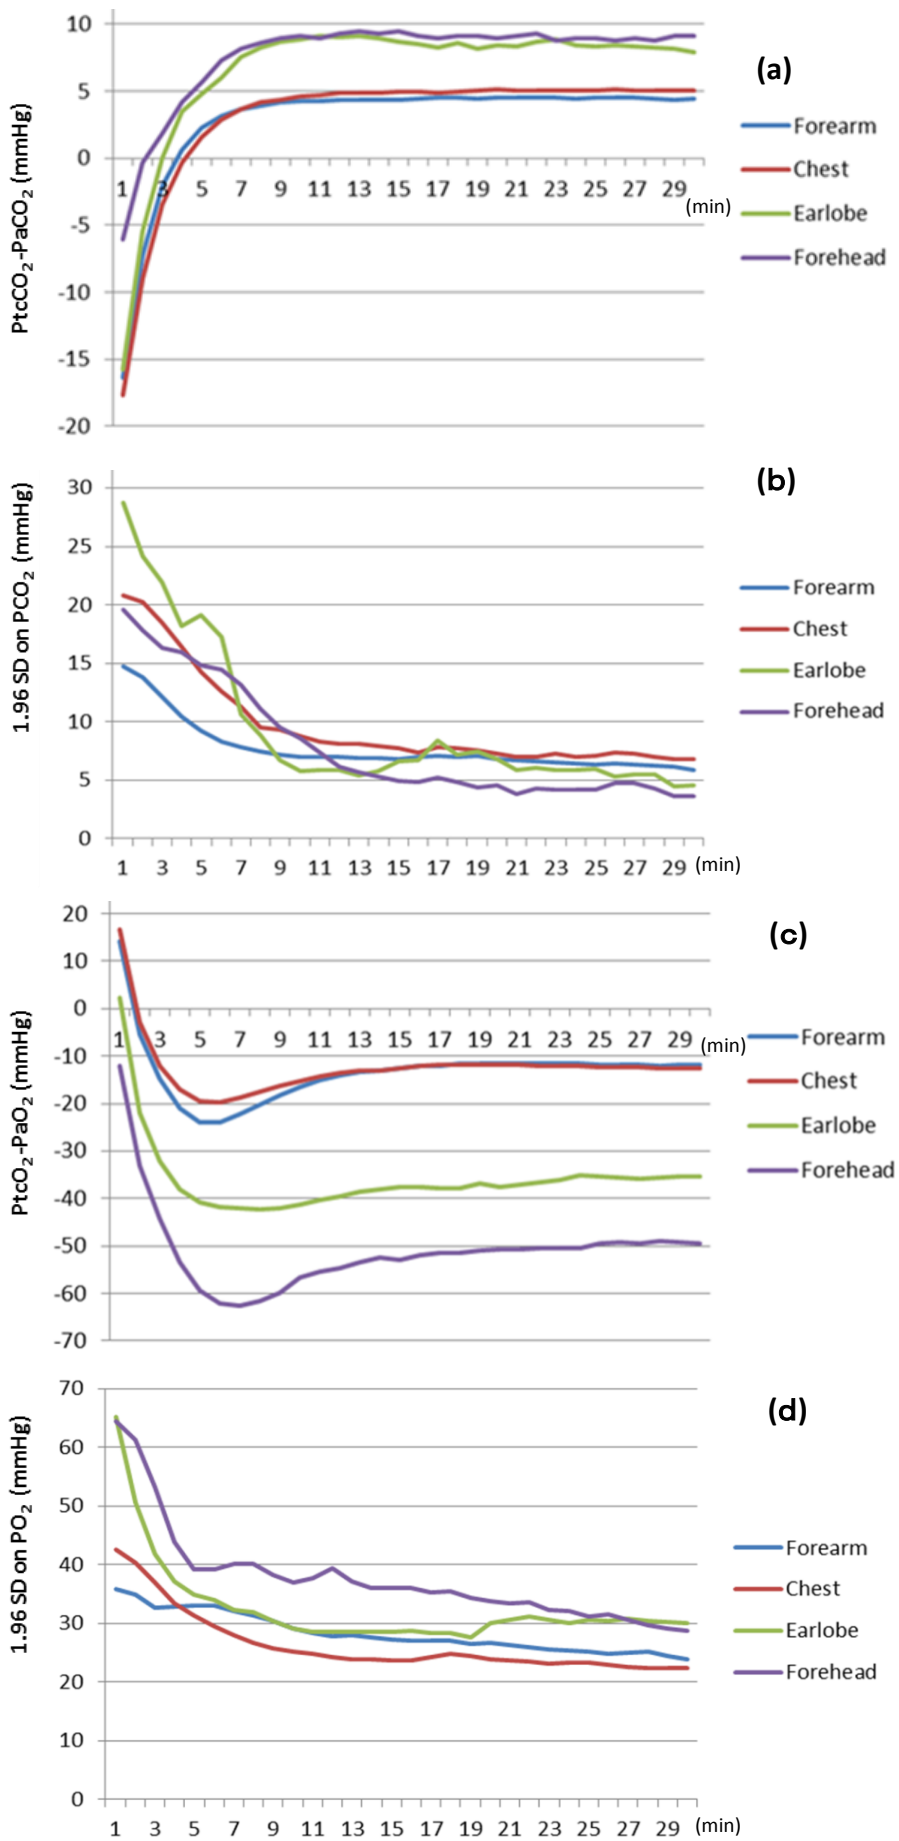

Fig. S1

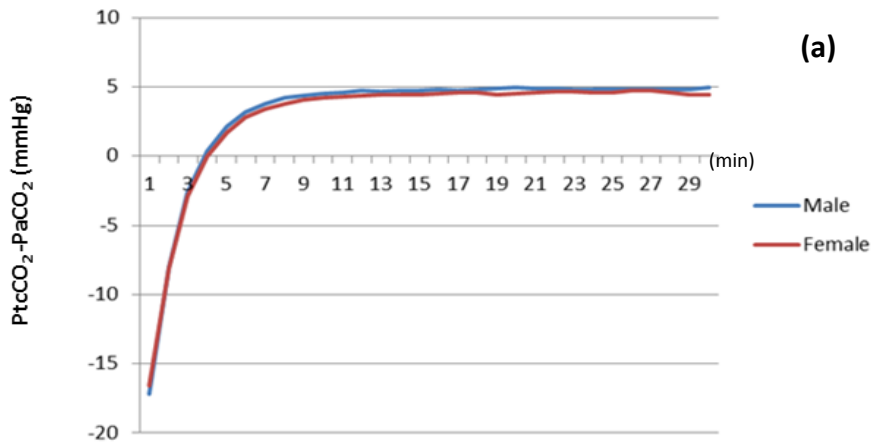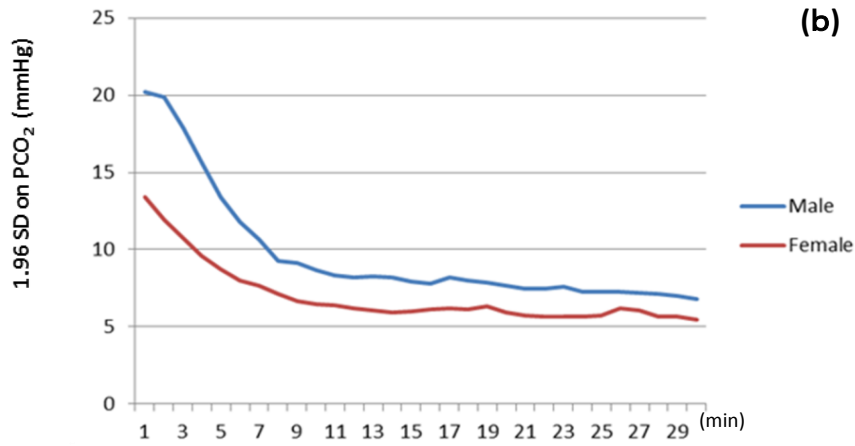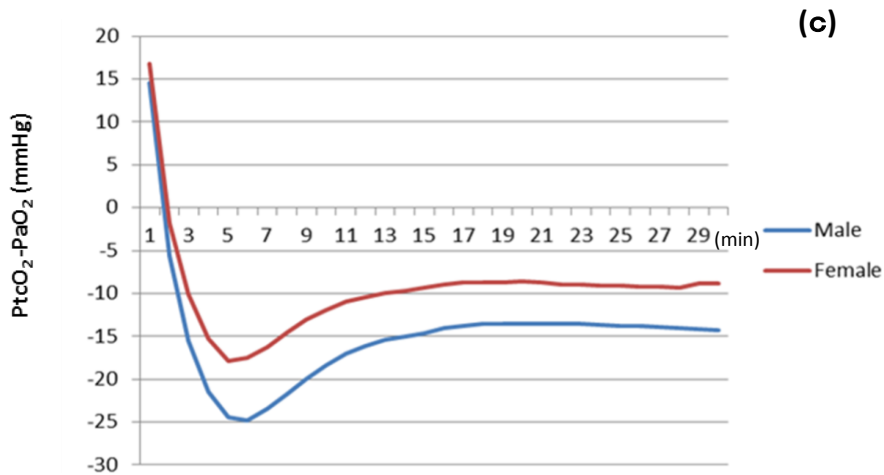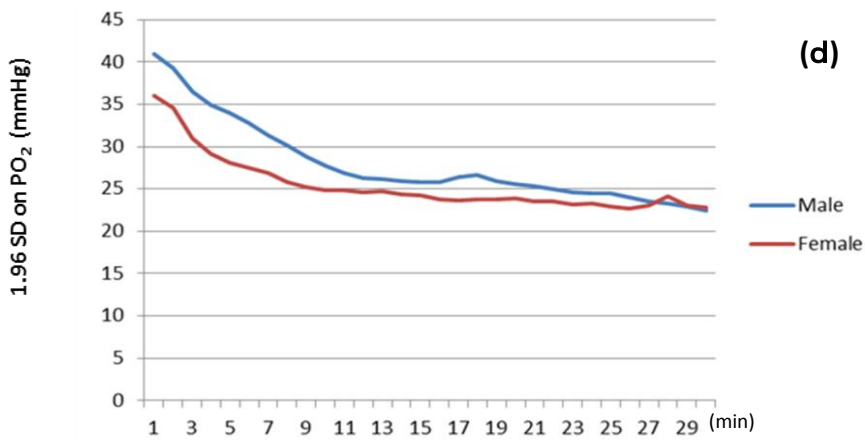

Fig. S2

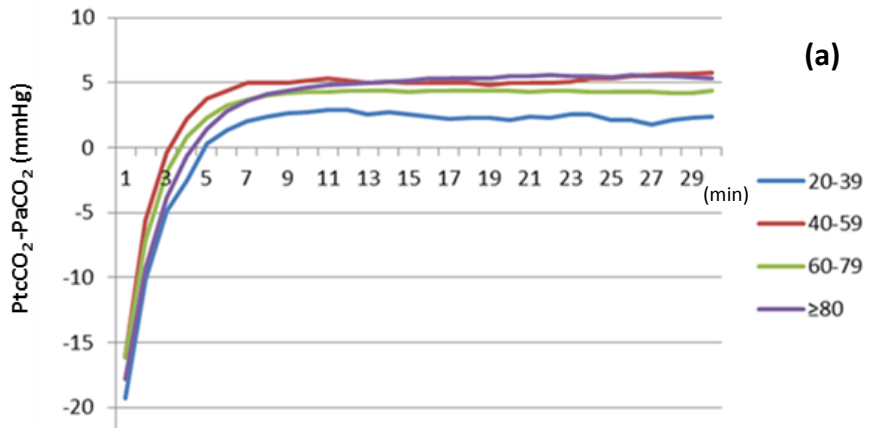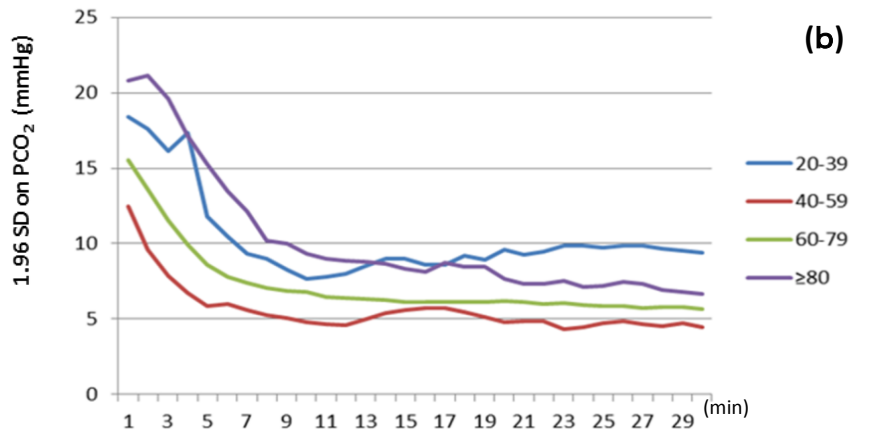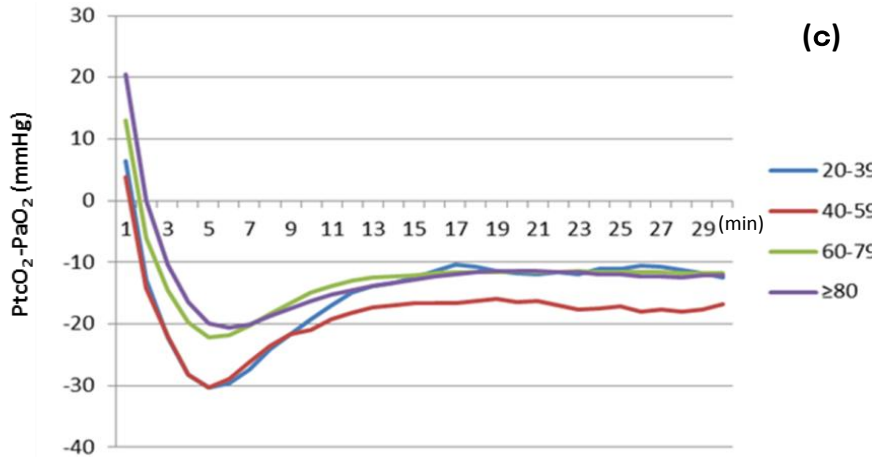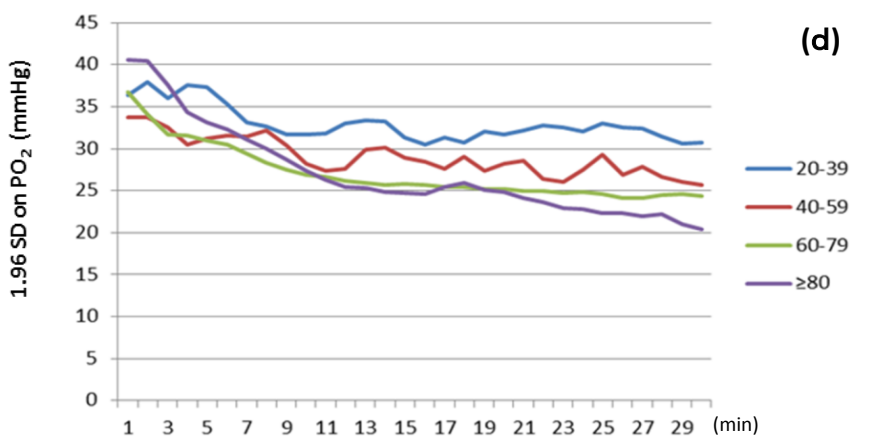

Fig. S3

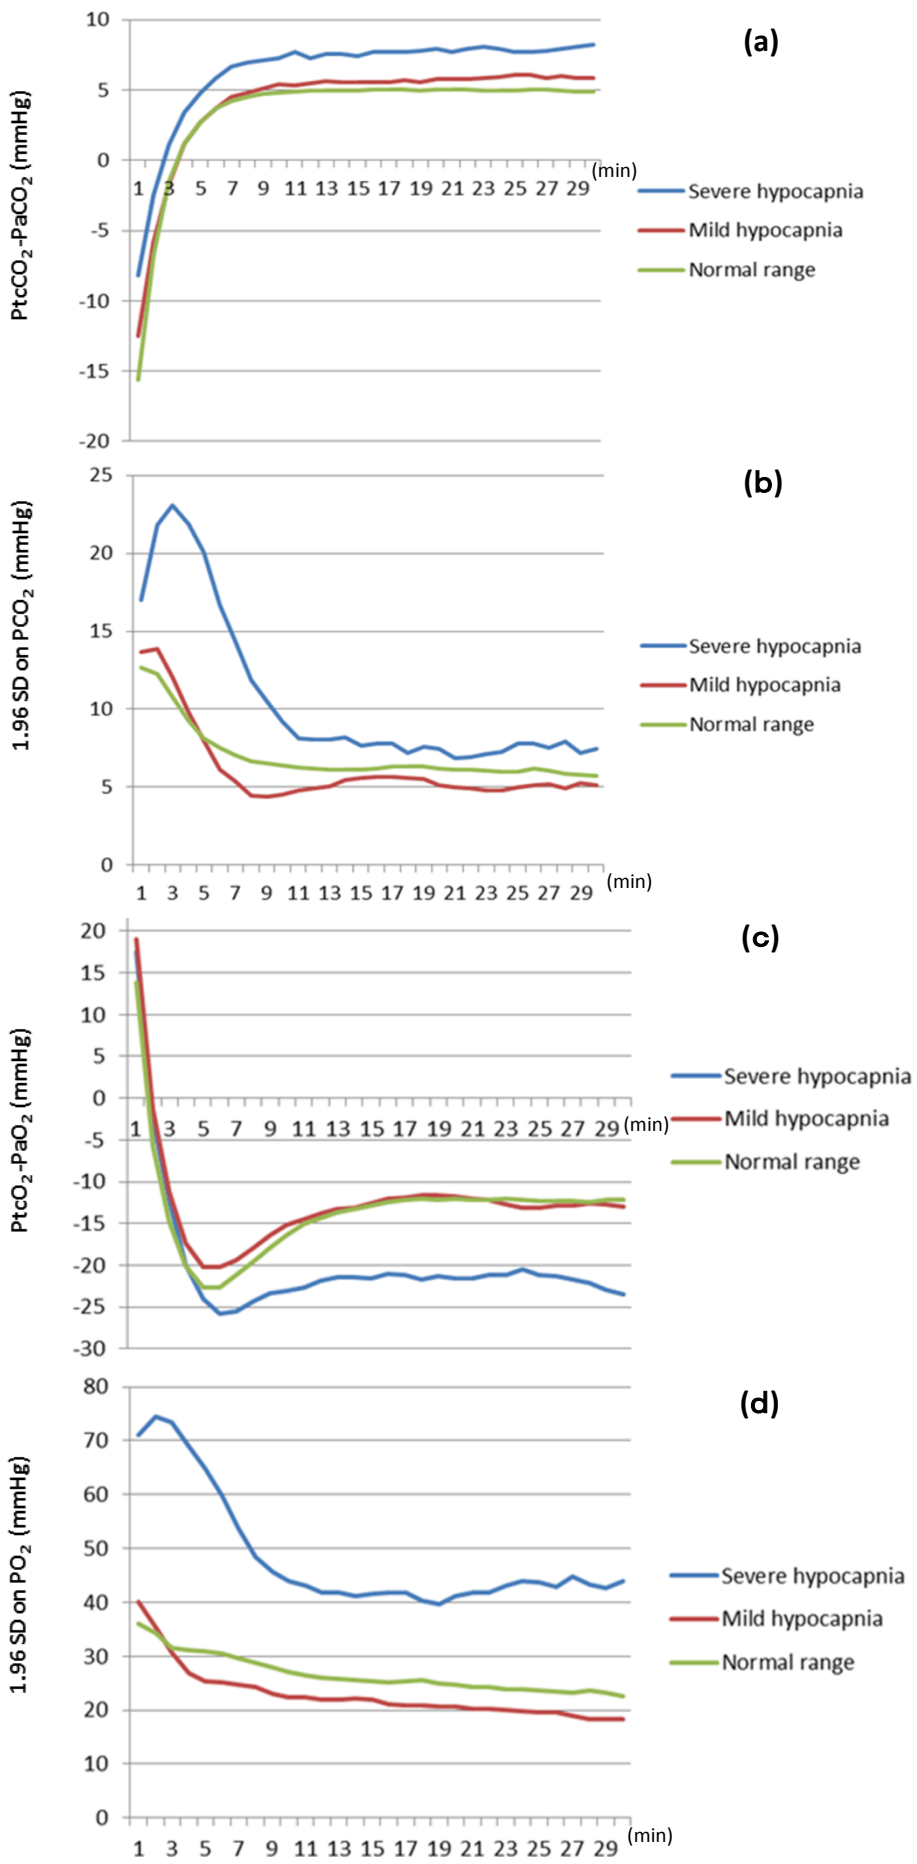

Fig. S4

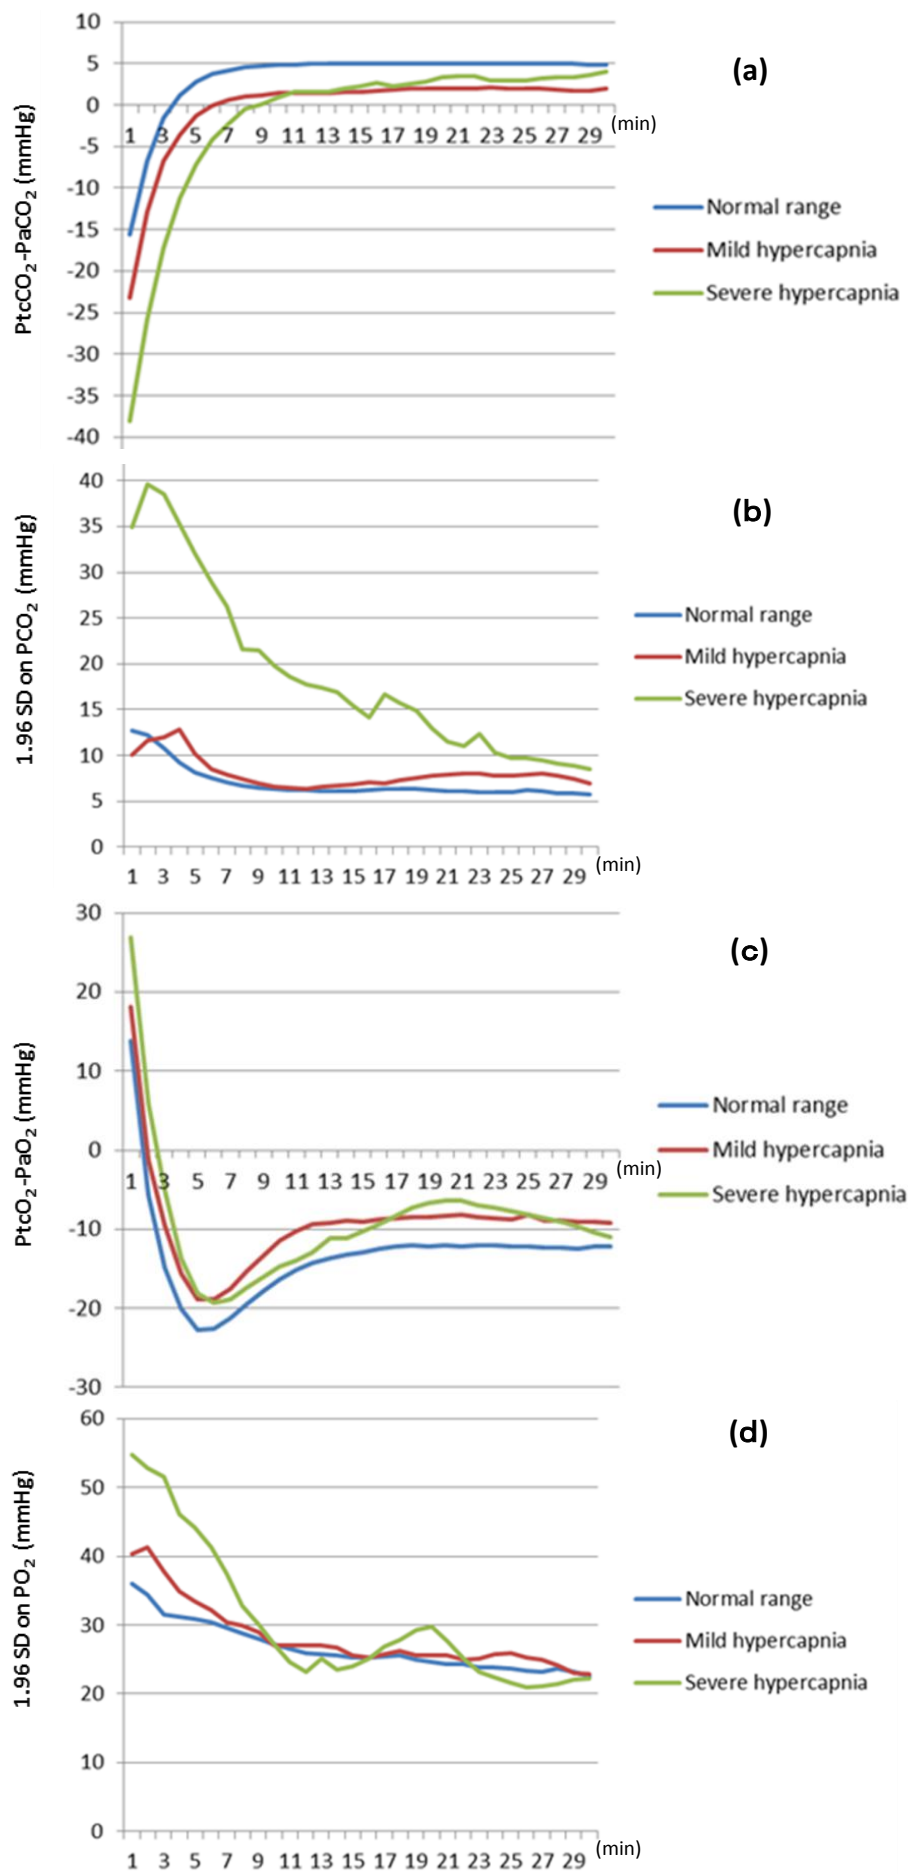

Fig. S5

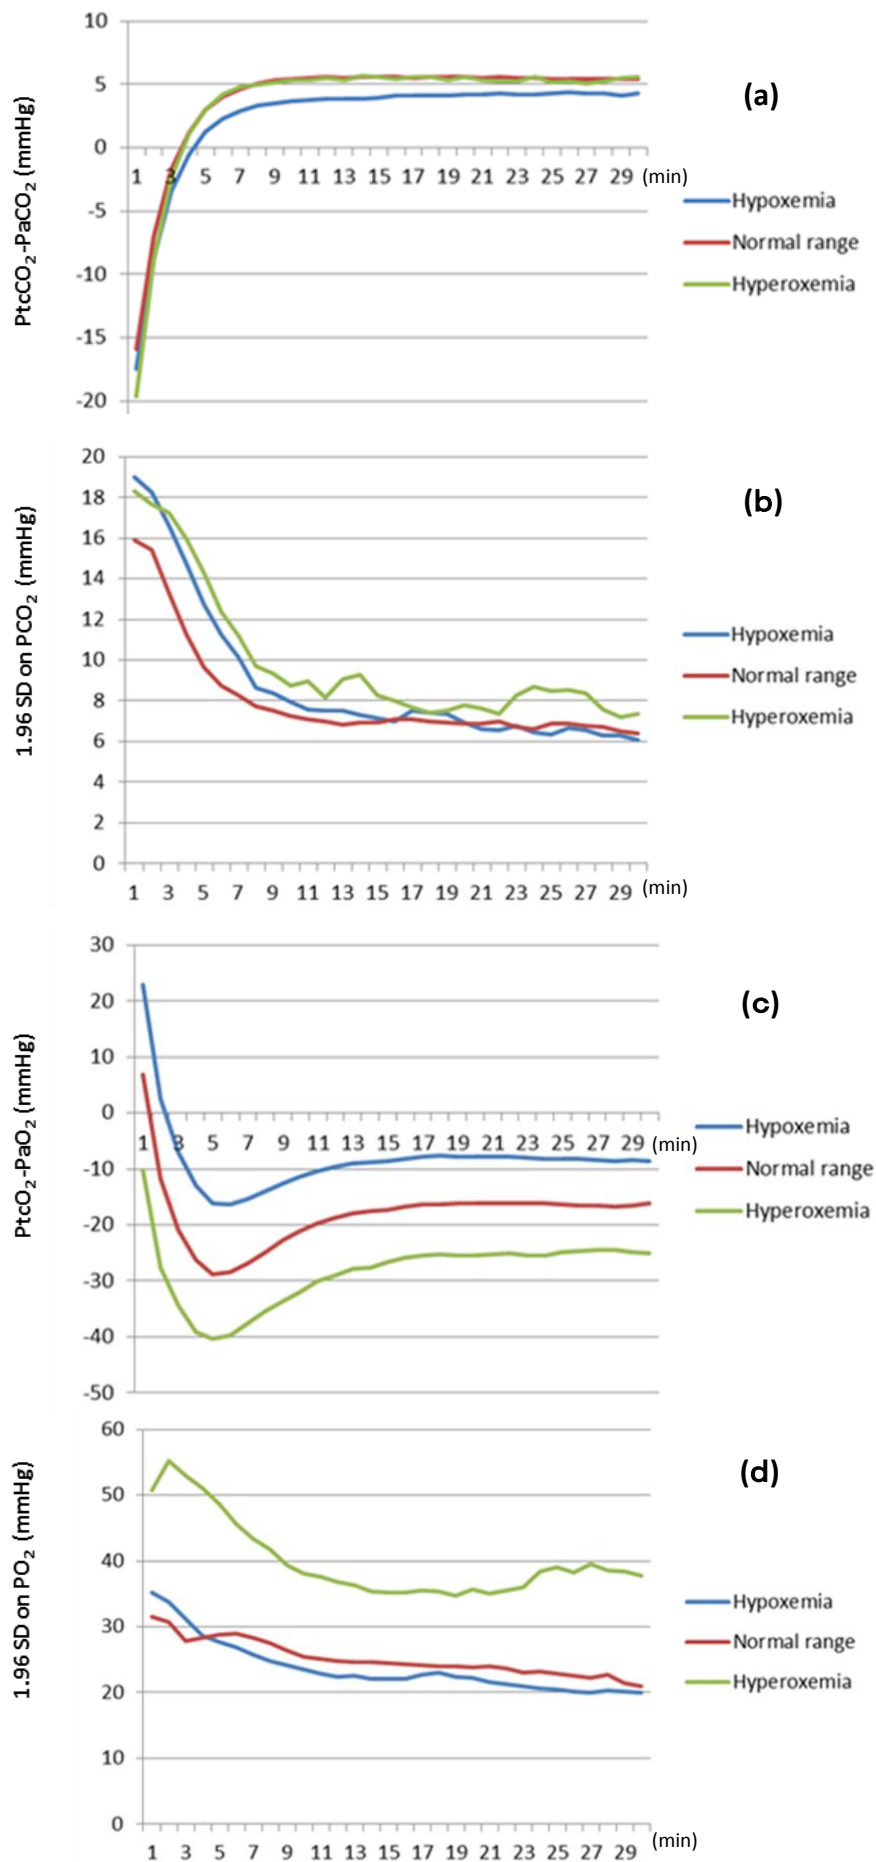

Fig. S6
